# Supplementary material for: Design, Synthesis, and Antimicrobial Activity Evaluation of Ciprofloxacin—Indole Hybrids
Source: MDPI journal article supplement (doi:10.3390/molecules28176325), 2023-08-29
Supplement: s1 [file s1]

## Supporting Information

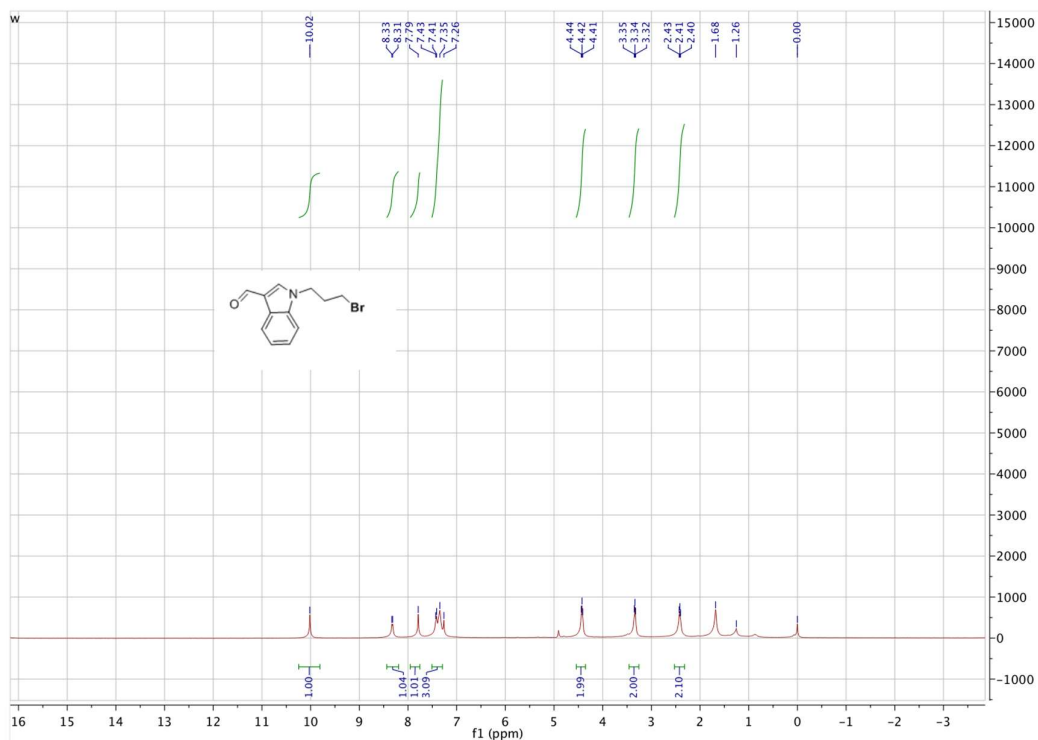

<sup>1</sup>H NMR of compound 1

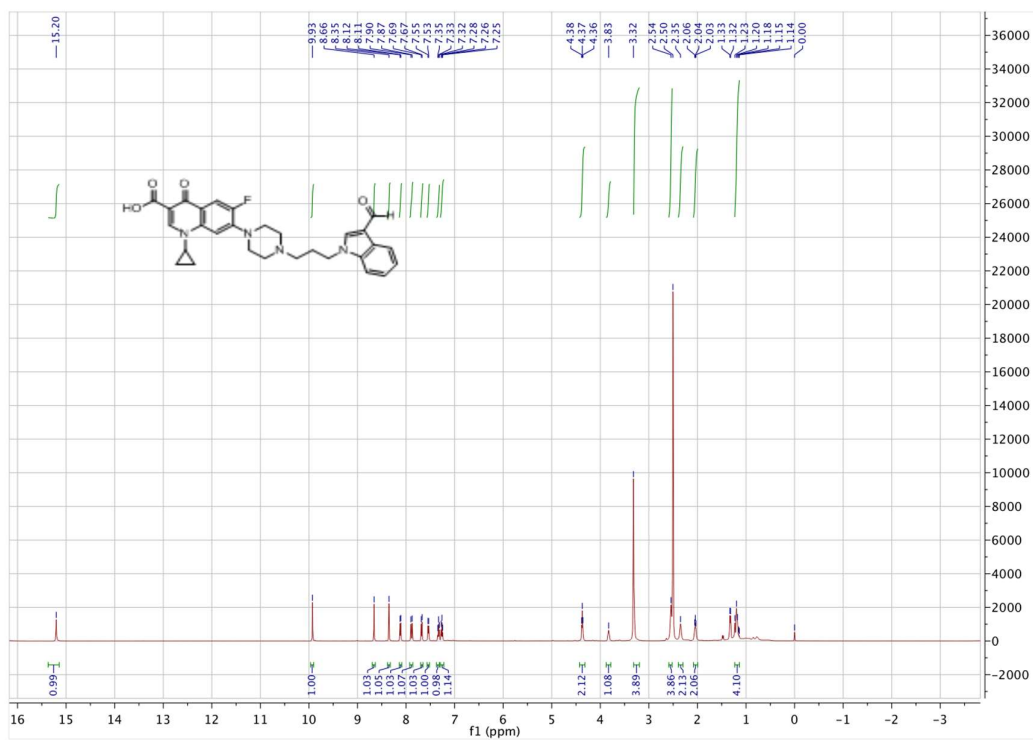

<sup>1</sup>H NMR of compound 2

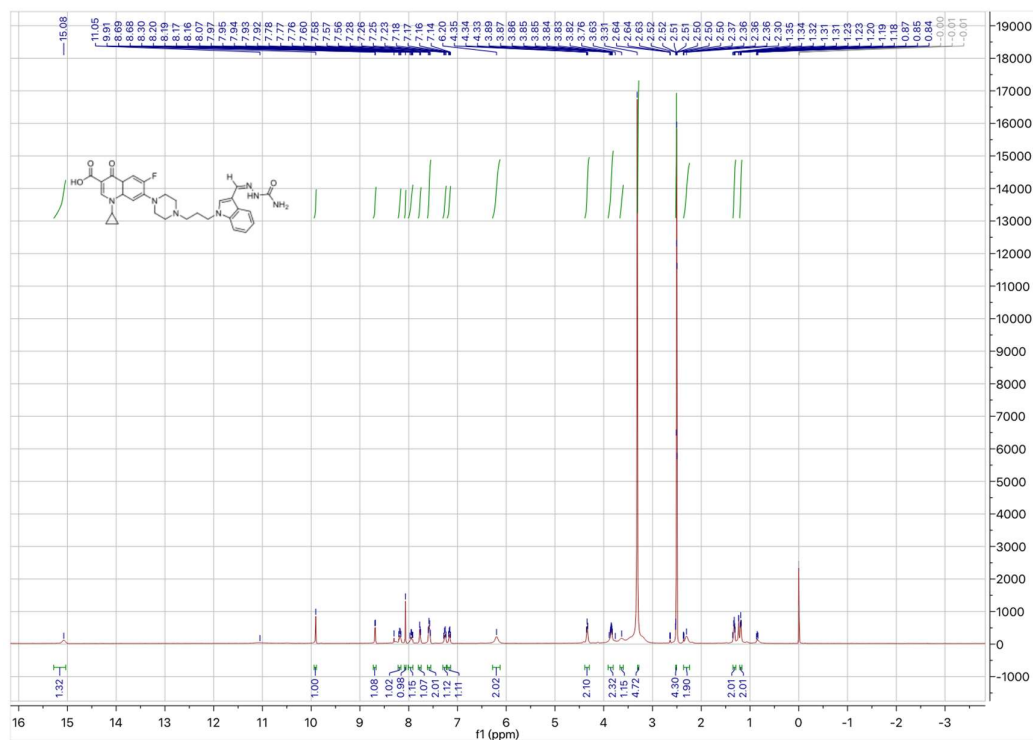

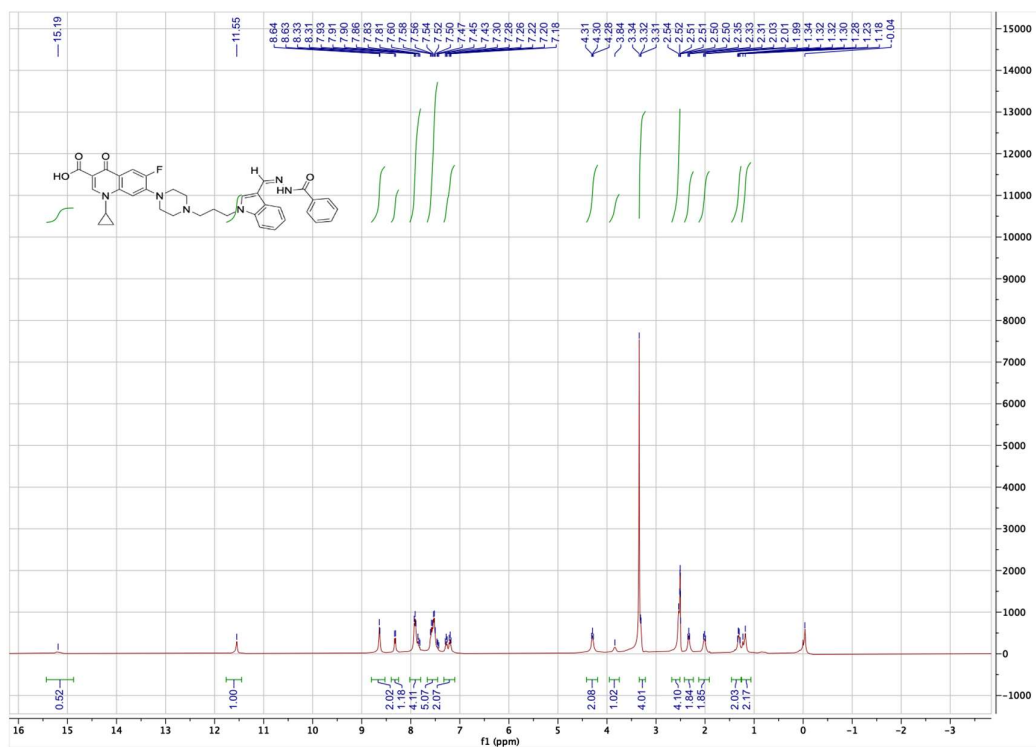

<sup>1</sup>H NMR of compound 3c

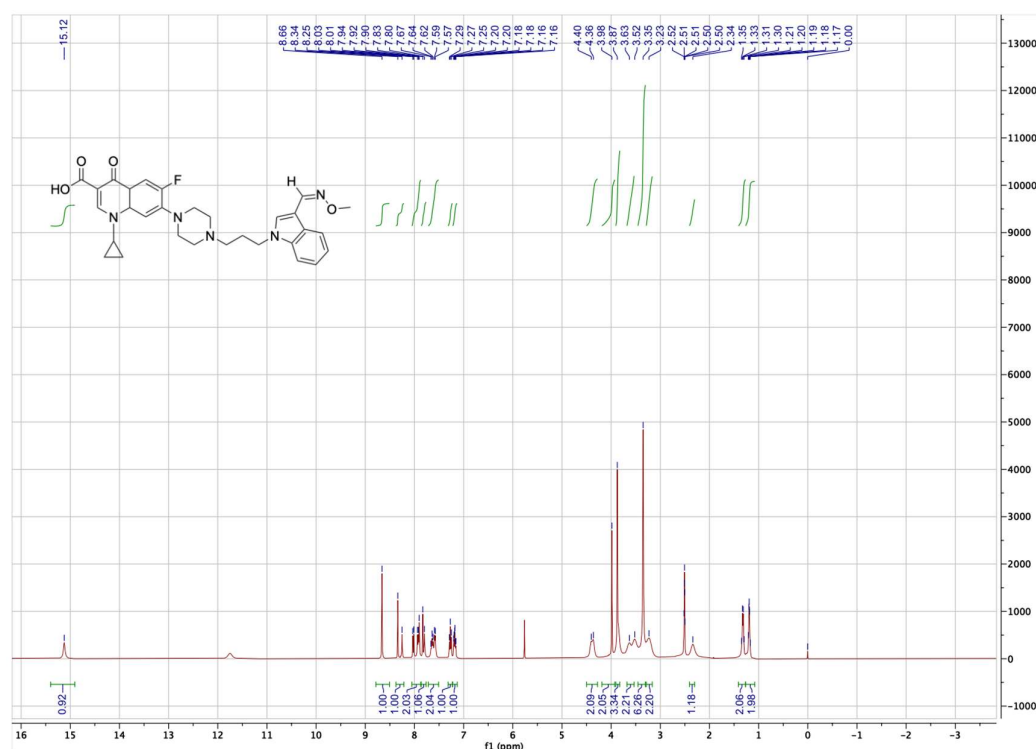

<sup>1</sup>H NMR of compound 3d

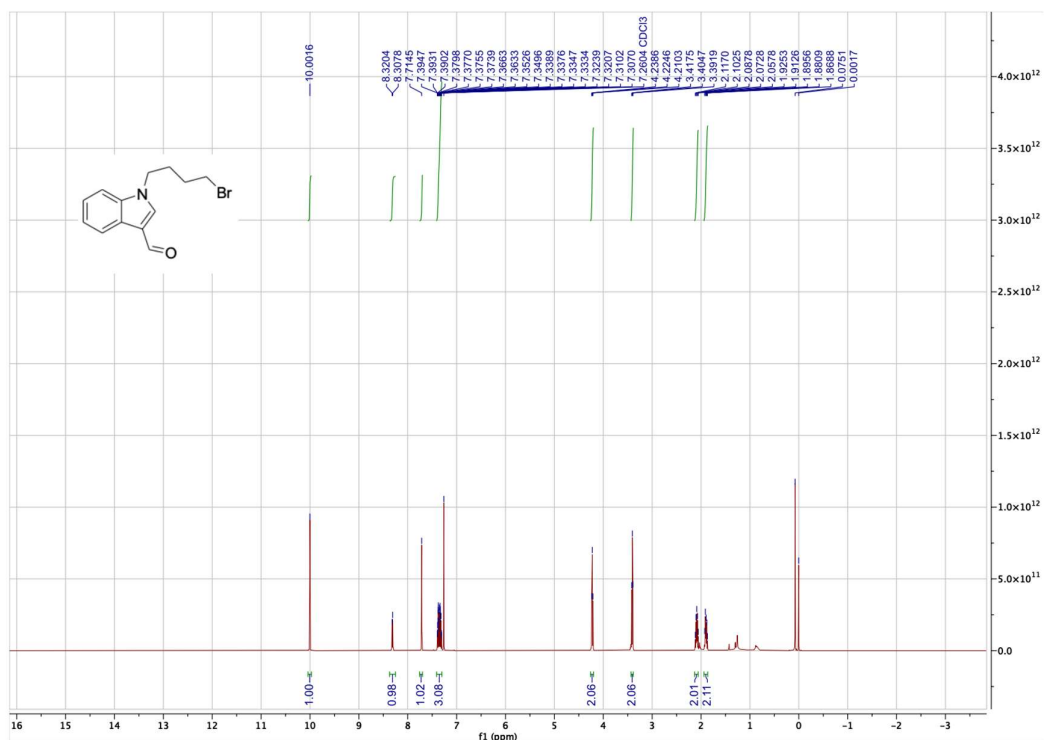

<sup>1</sup>H NMR of compound 4a

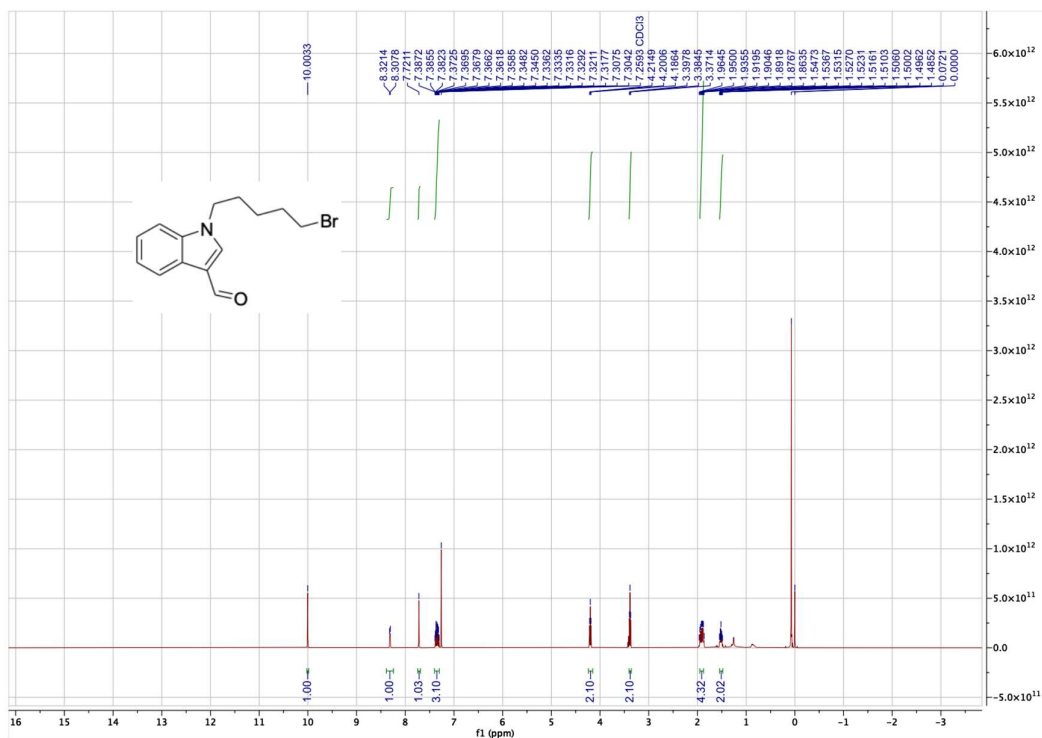

<sup>1</sup>H NMR of compound 4b

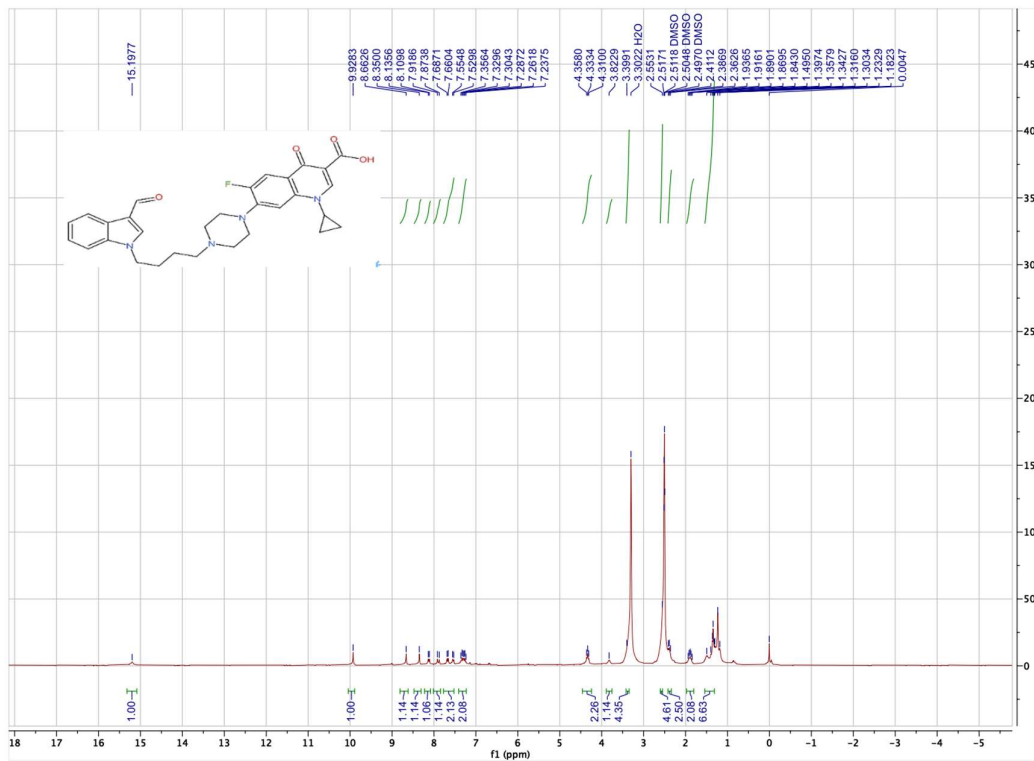

<sup>1</sup>H NMR of compound 5a

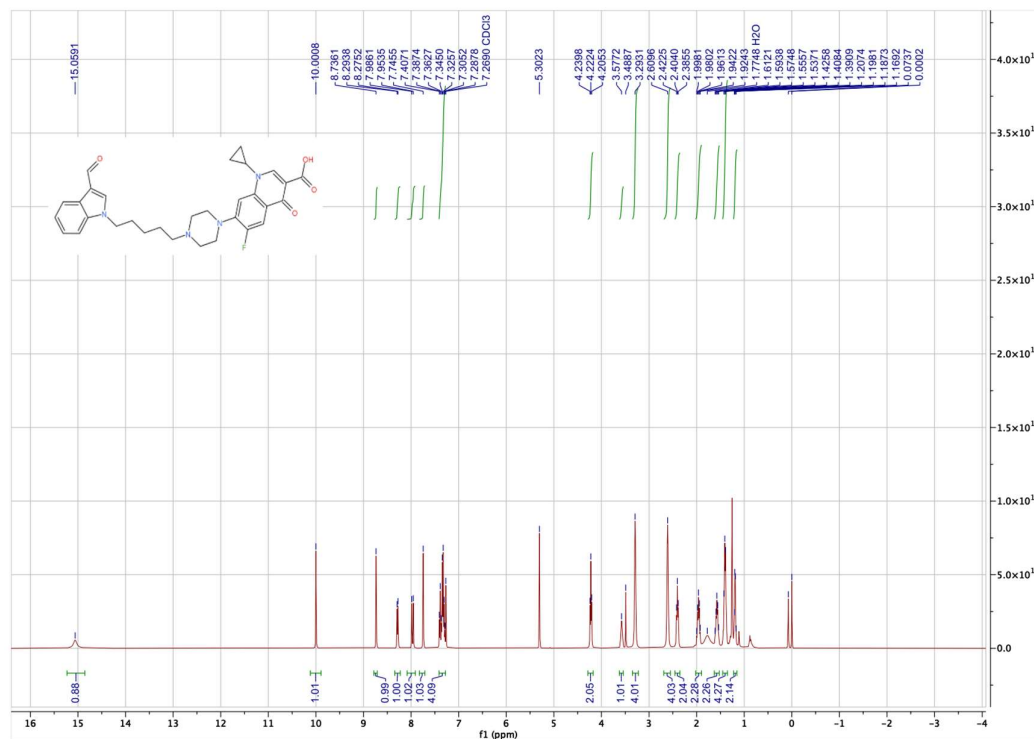

<sup>1</sup>H NMR of compound 5b

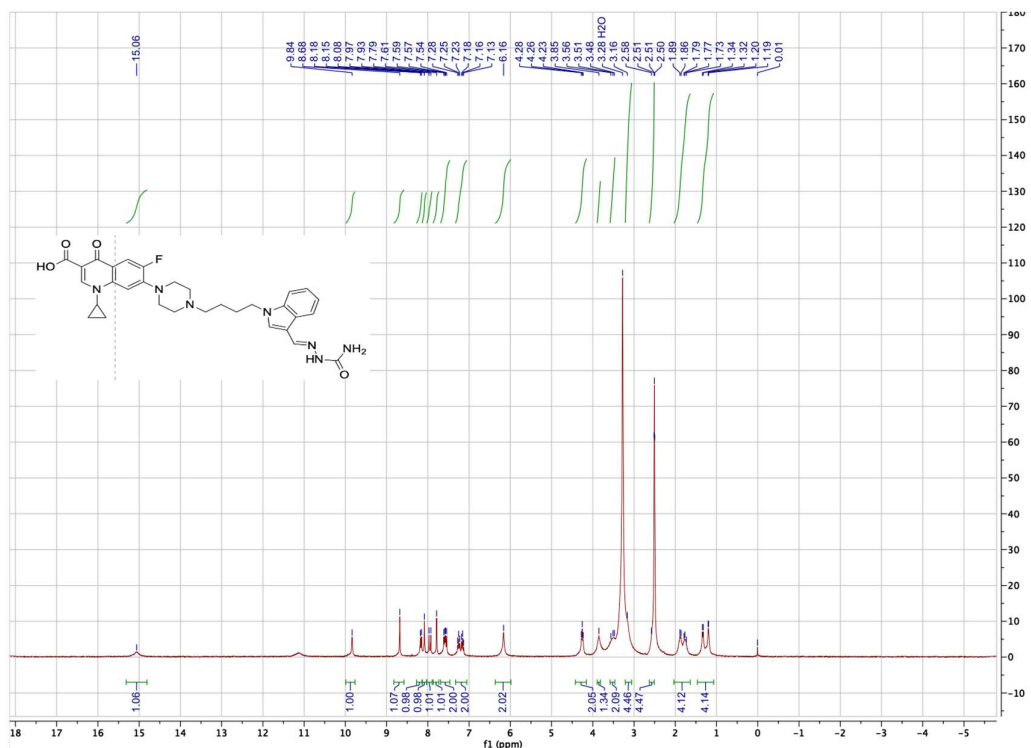

<sup>1</sup>H NMR of compound 6a

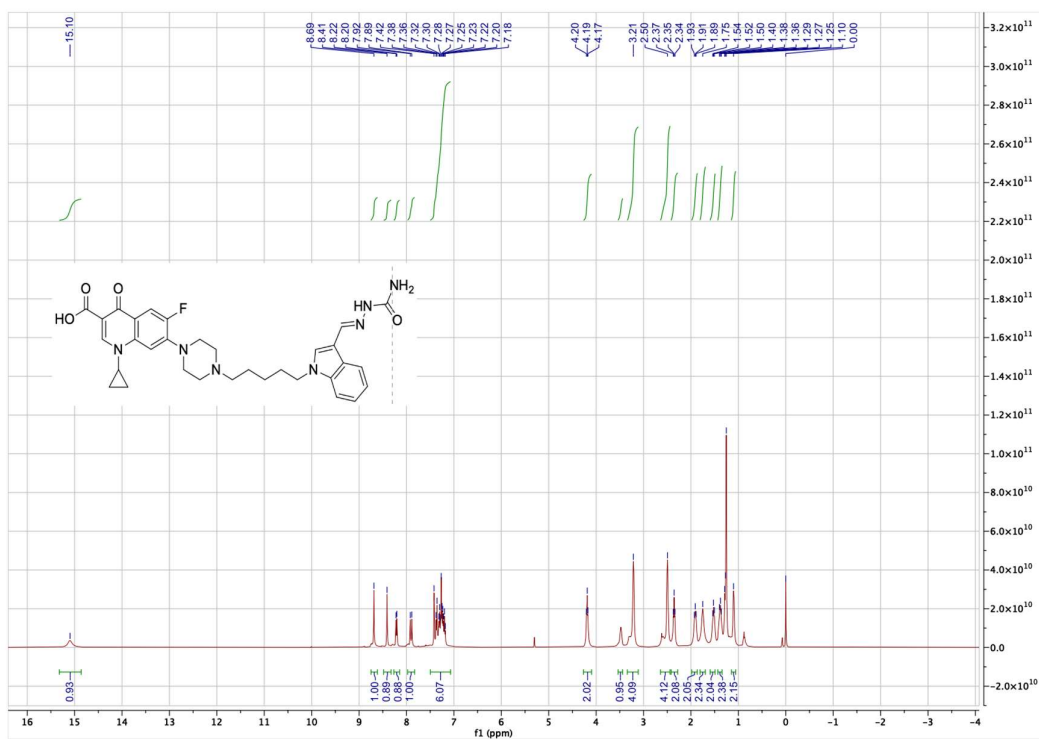

<sup>1</sup>H NMR of compound 6b

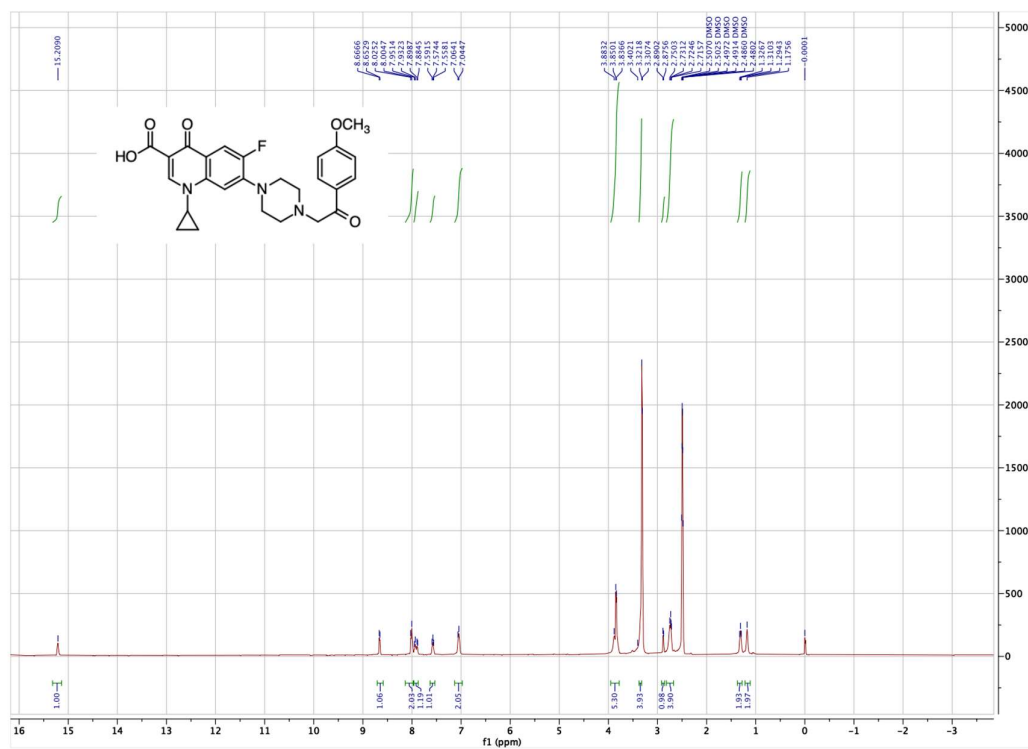

*<sup>1</sup>H NMR of compound 7a*

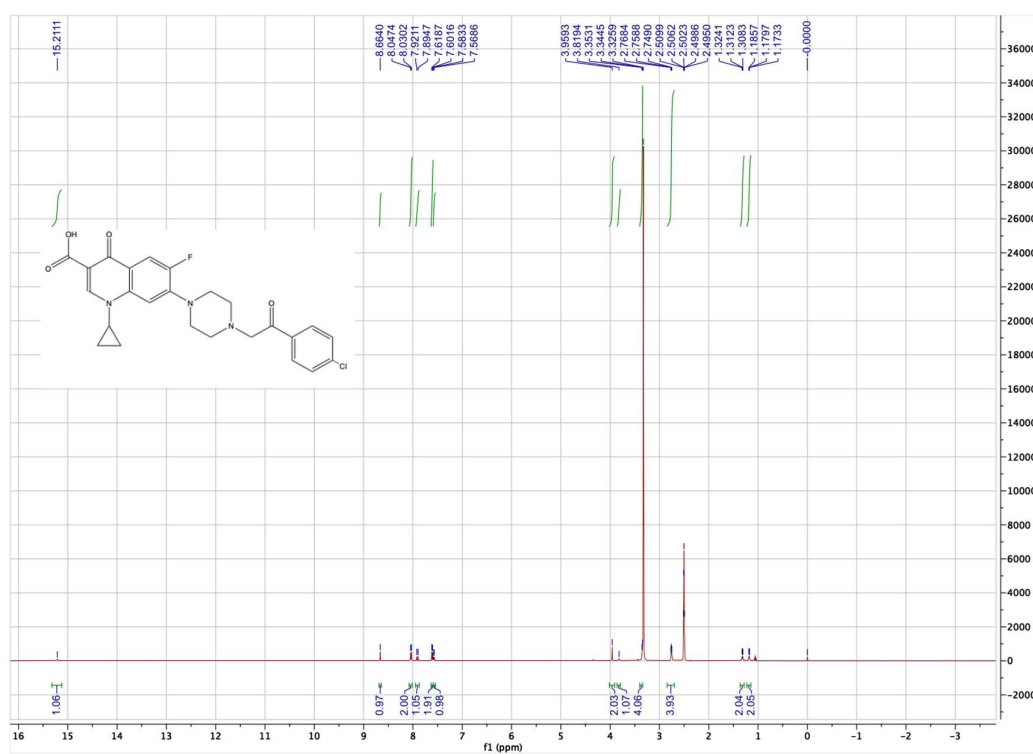

*<sup>1</sup>H NMR of compound 7b*

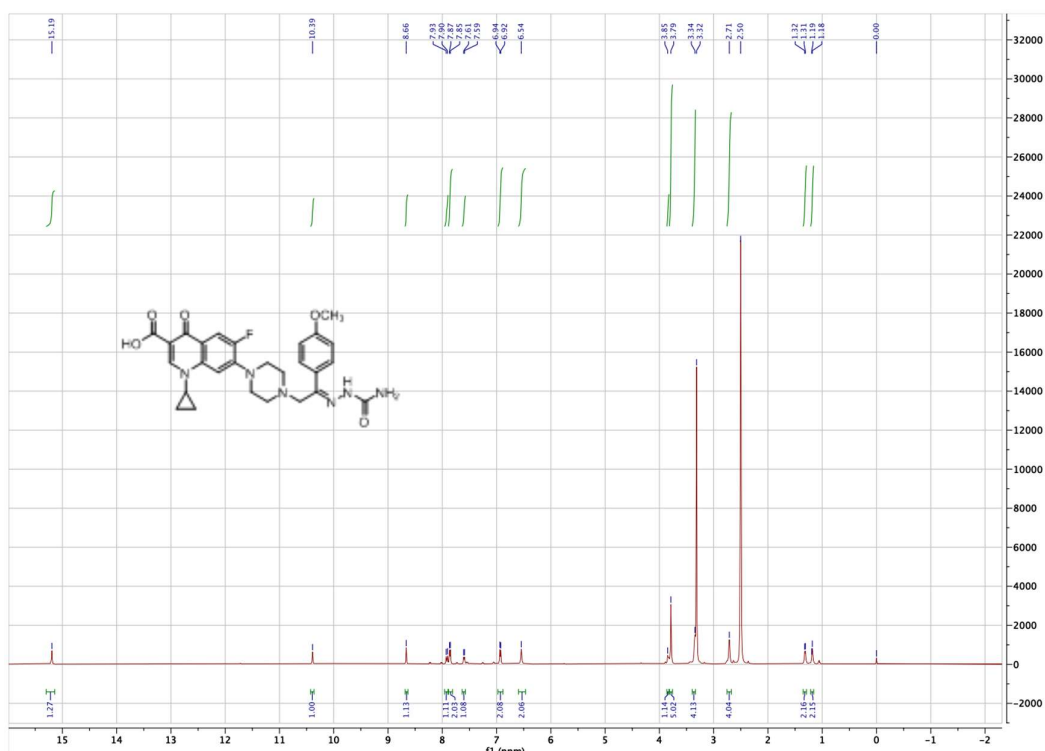

<sup>1</sup>H NMR of compound 8a

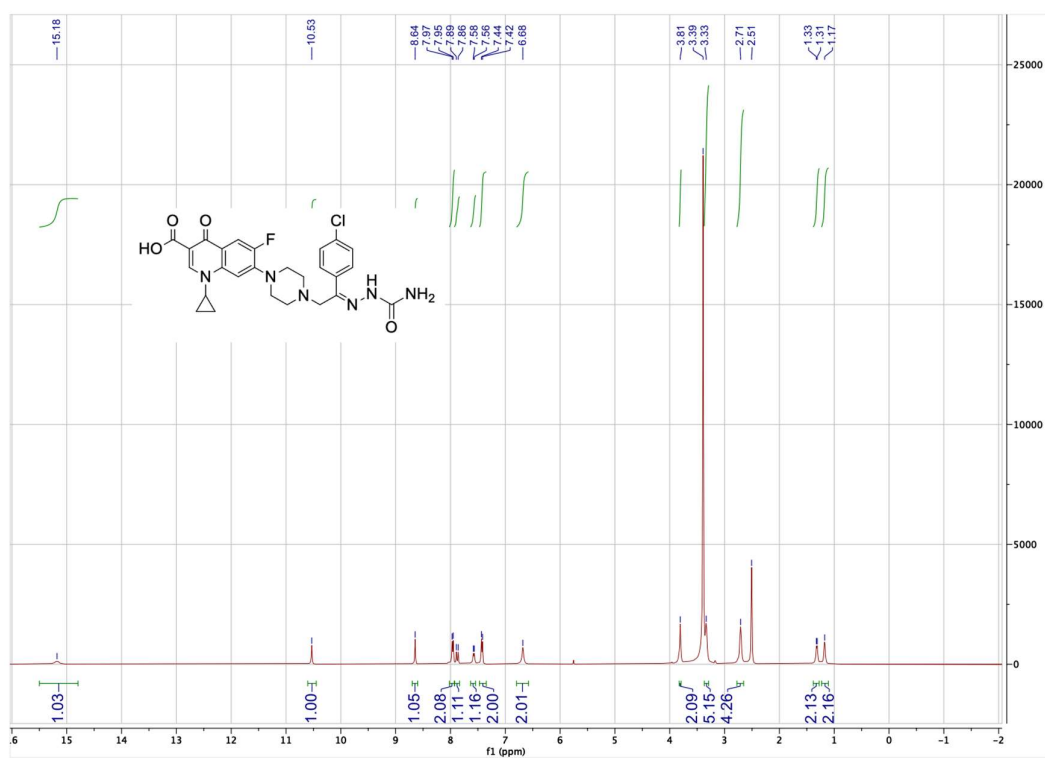

<sup>1</sup>H NMR of compound 8b



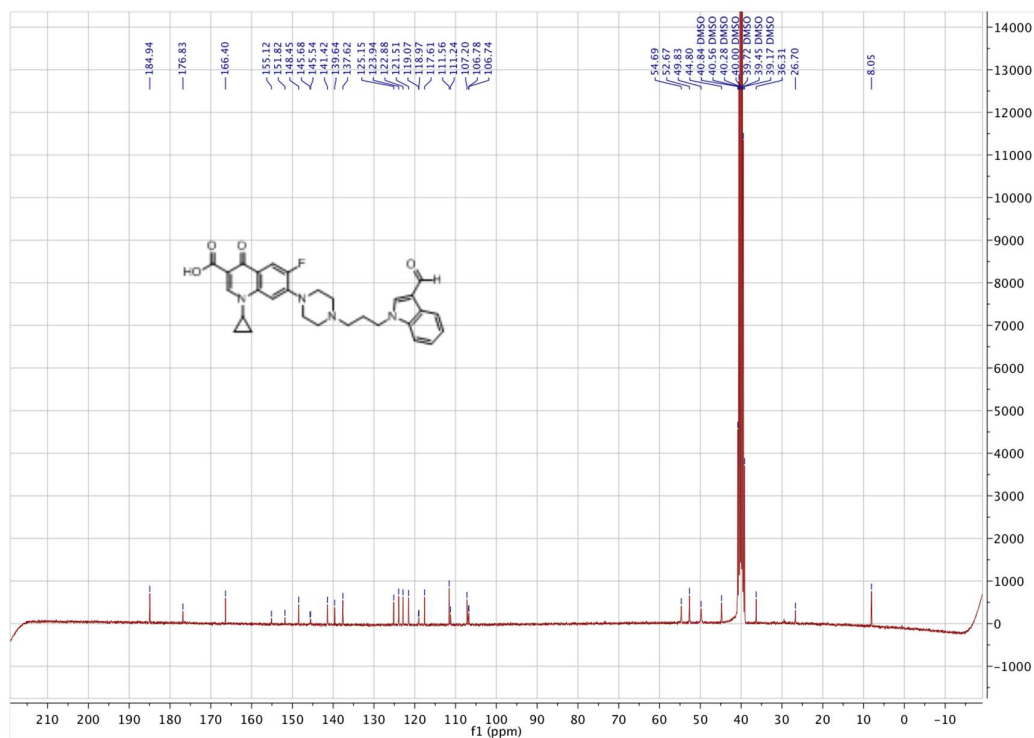

$^{13}\text{C}$  NMR of compound 2

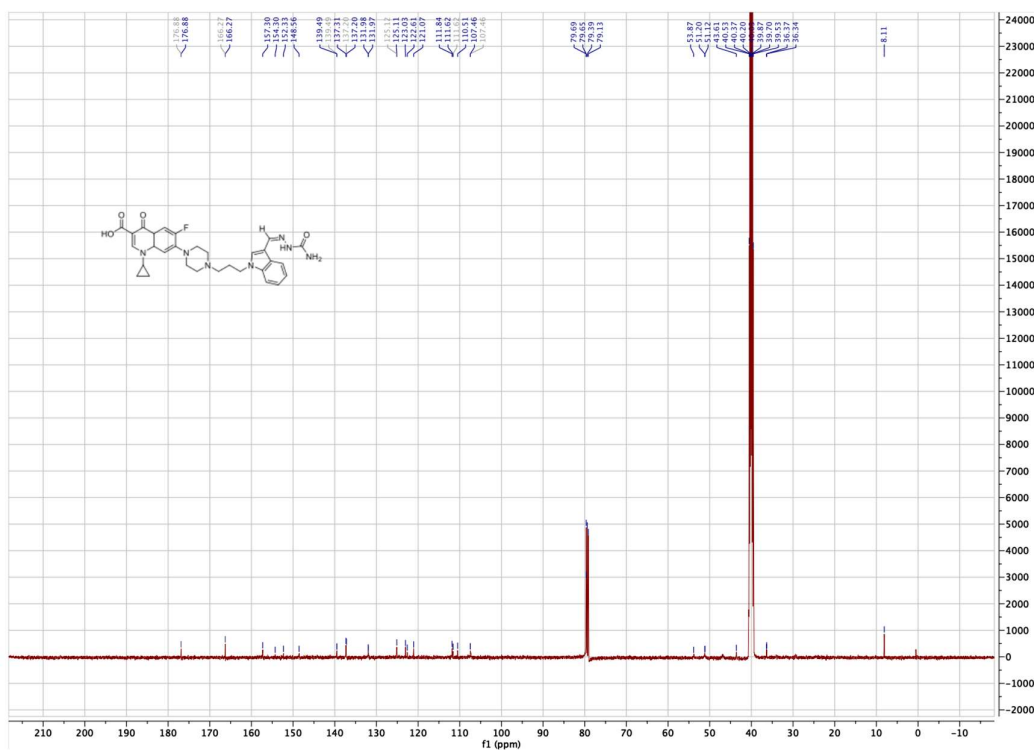

$^{13}\text{C}$  NMR of compound 3a

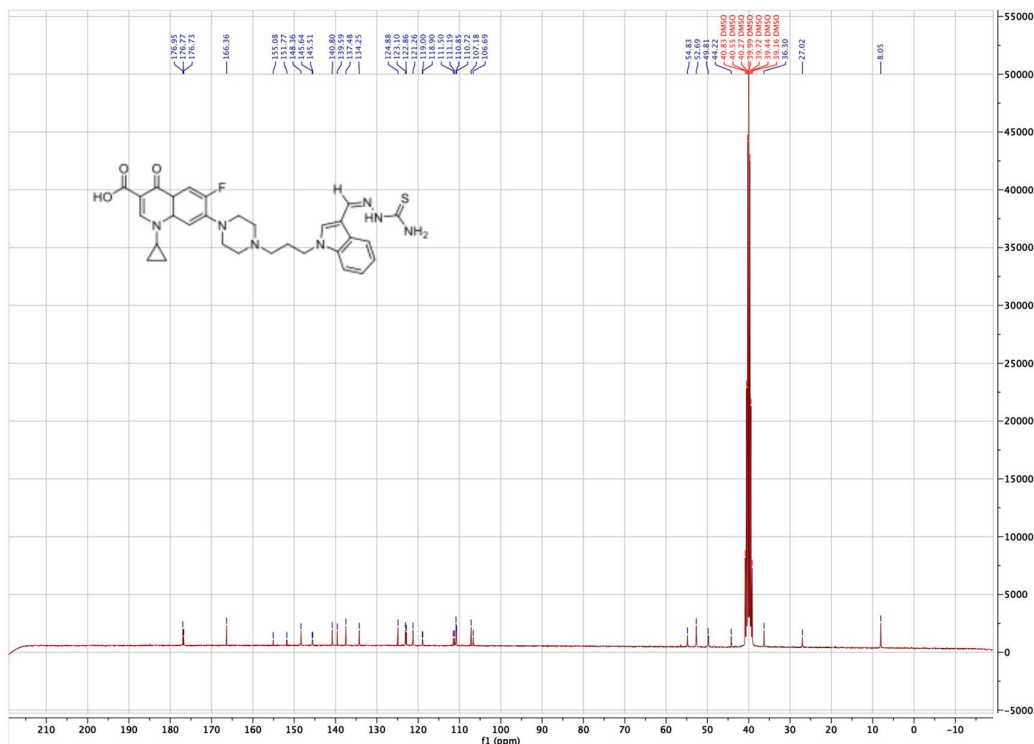

<sup>13</sup>C NMR of compound 3b

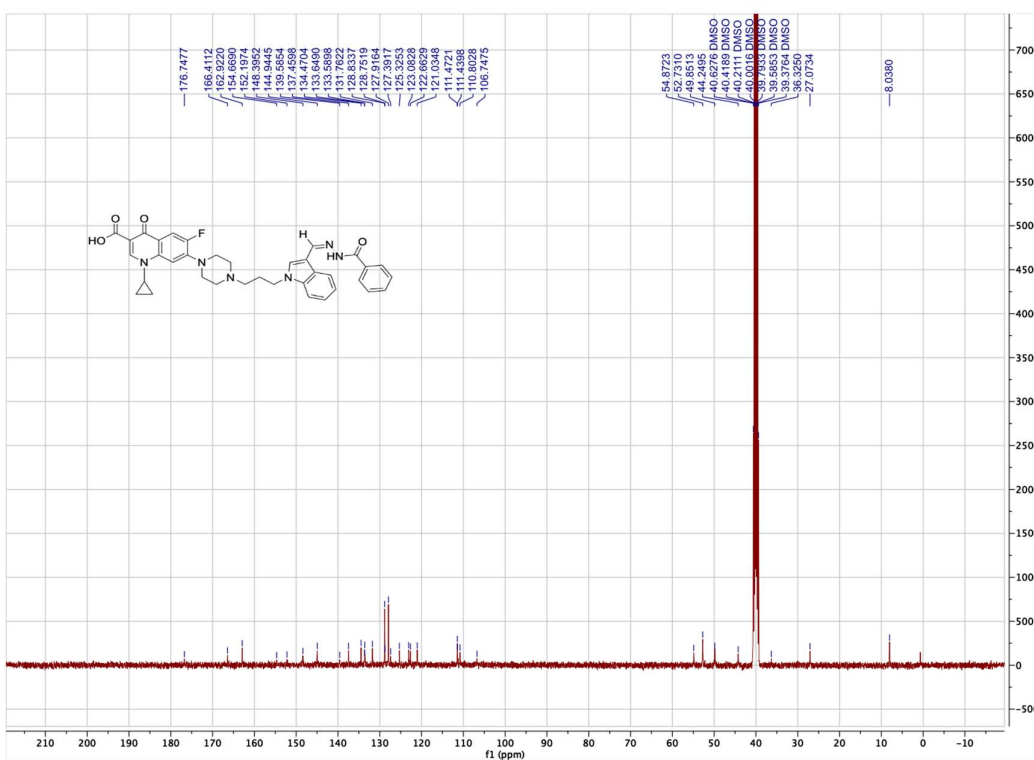

<sup>13</sup>C NMR of compound 3c

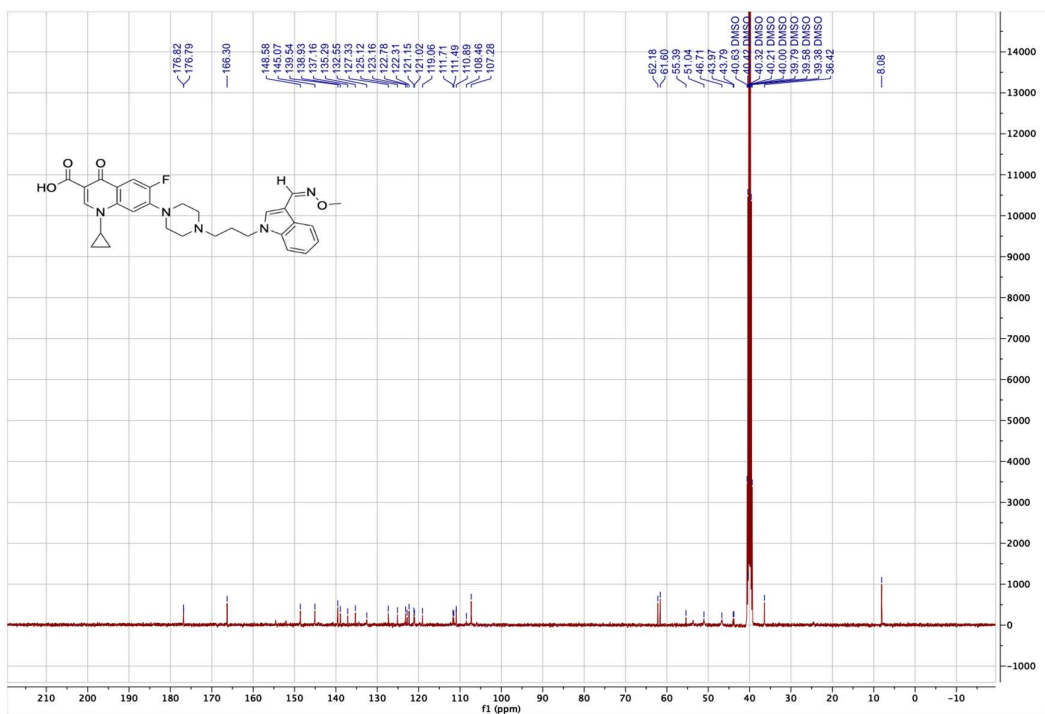

<sup>13</sup>C NMR of compound **3d**

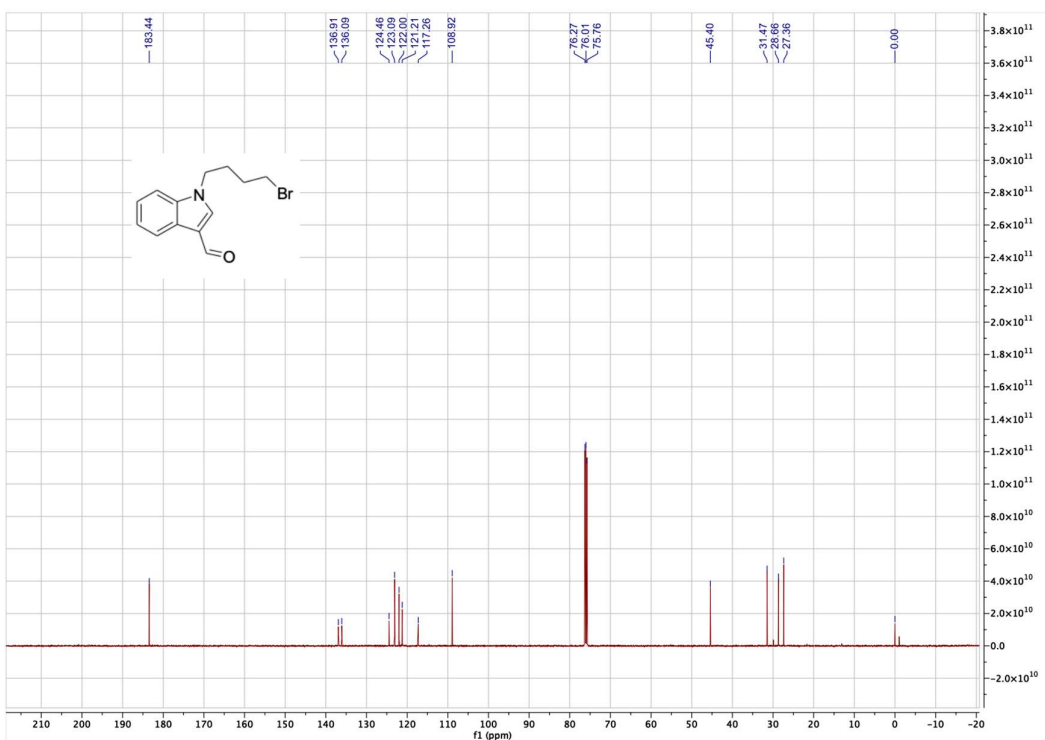

<sup>13</sup>C NMR of compound **4a**

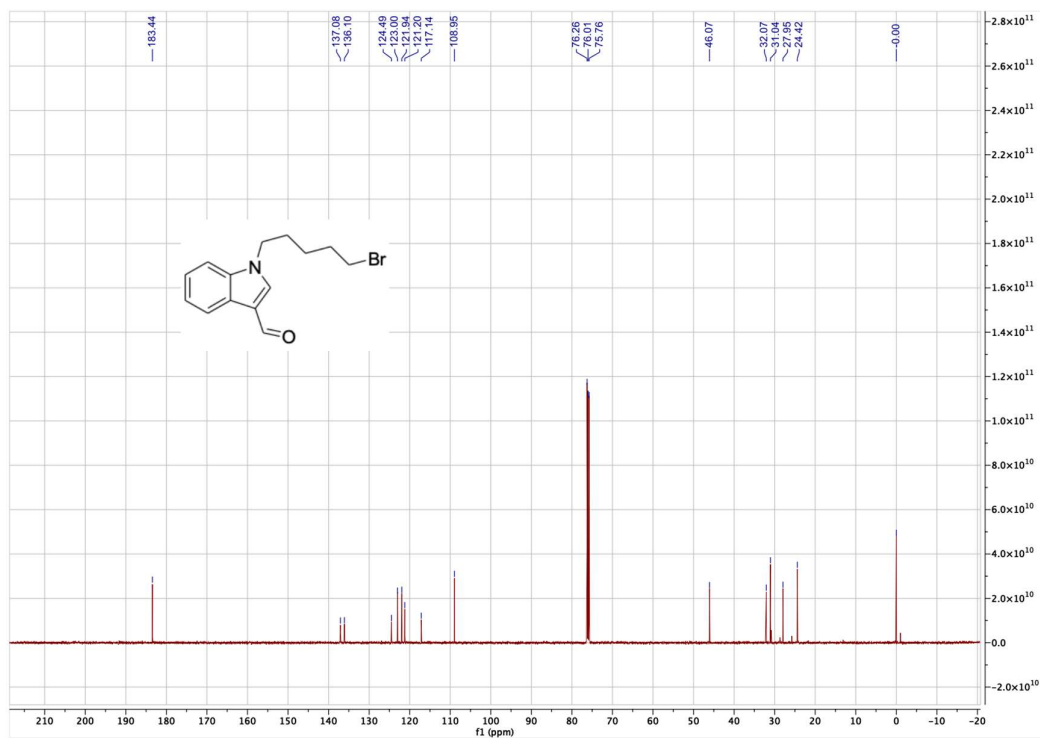

$^{13}\text{C}$  NMR of compound **4b**

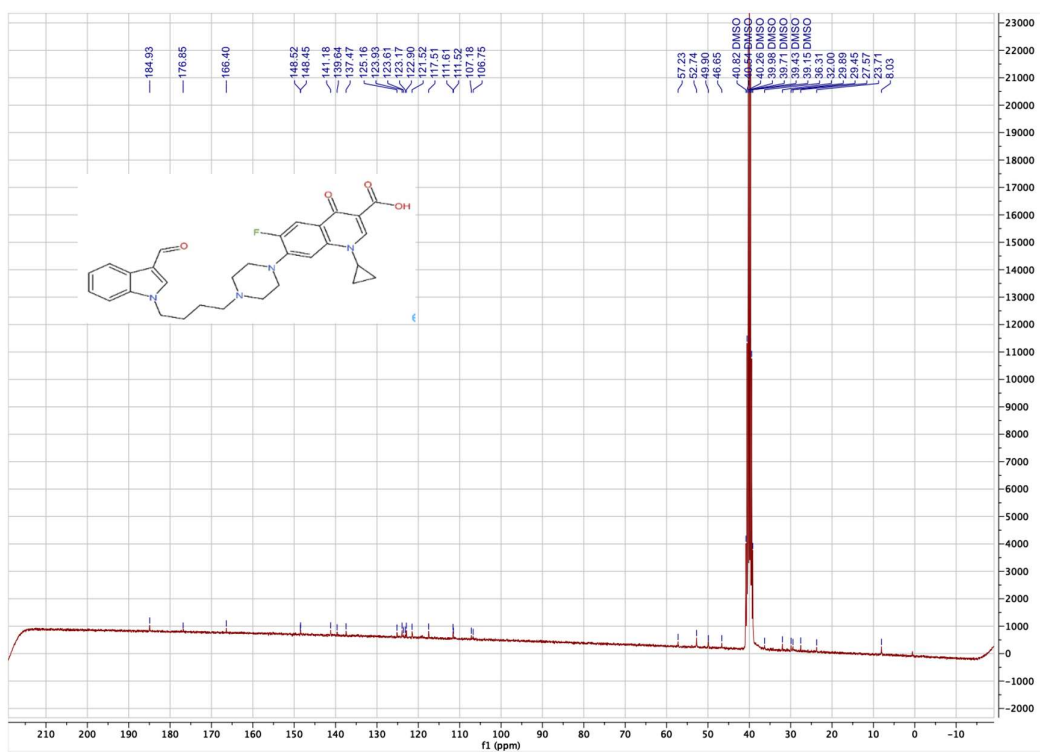

$^{13}\text{C}$  NMR of compound **5a**

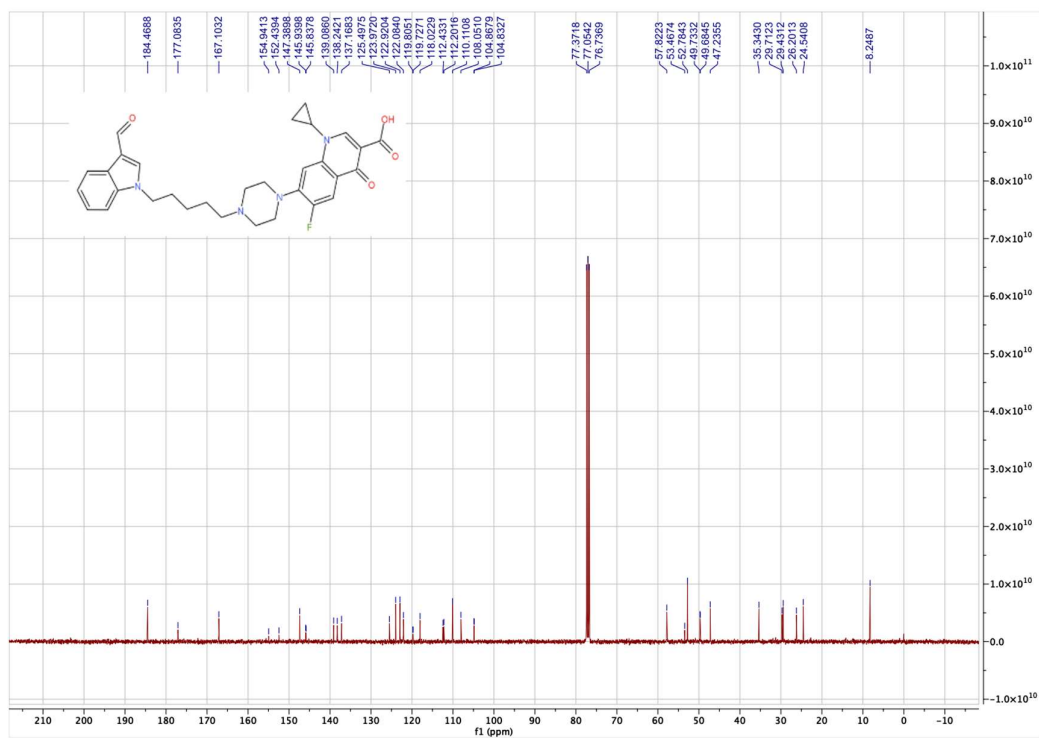

<sup>13</sup>C NMR of compound **5b**

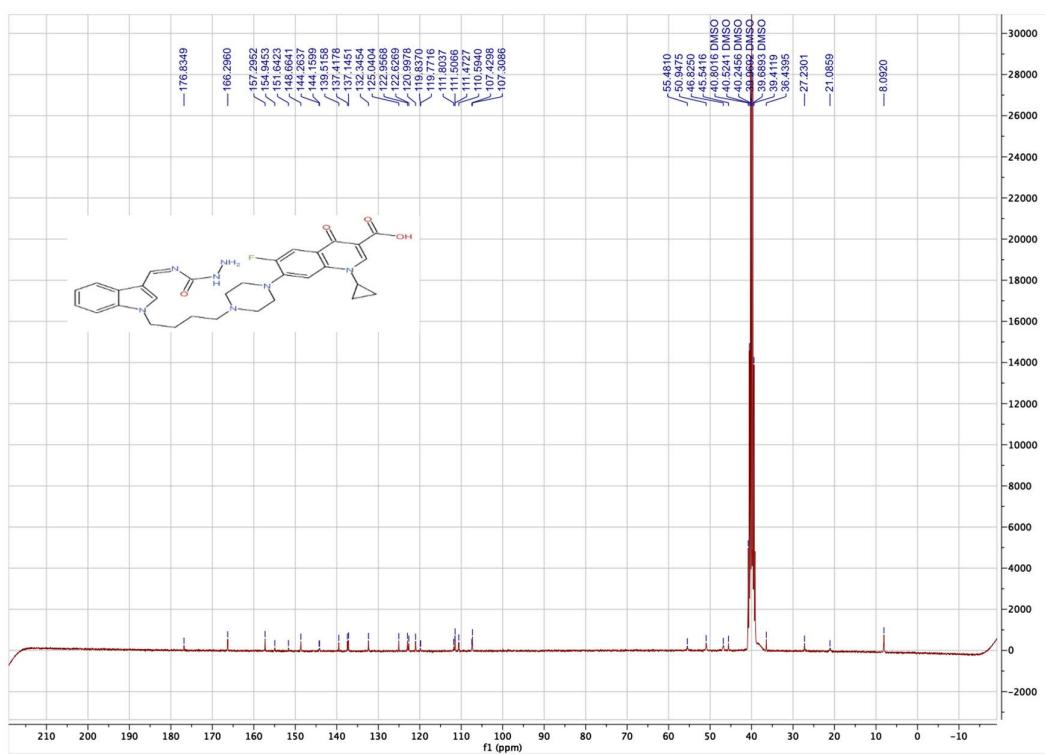

<sup>13</sup>C NMR of compound **6a**

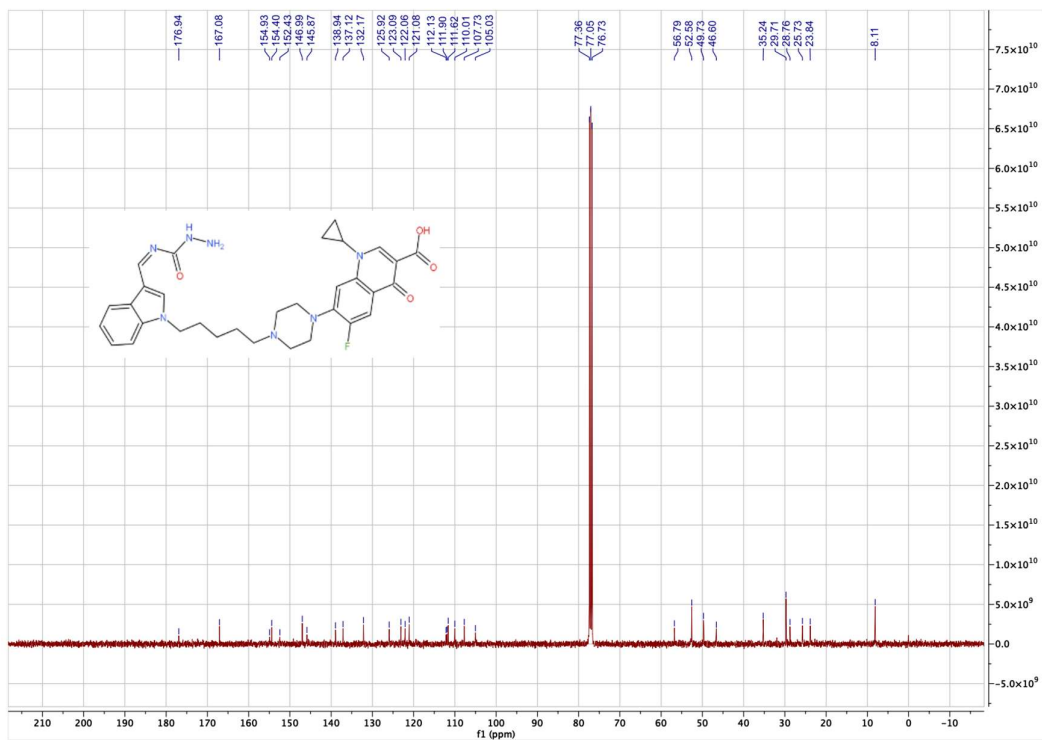 $^{13}\text{C}$  NMR of compound **6b**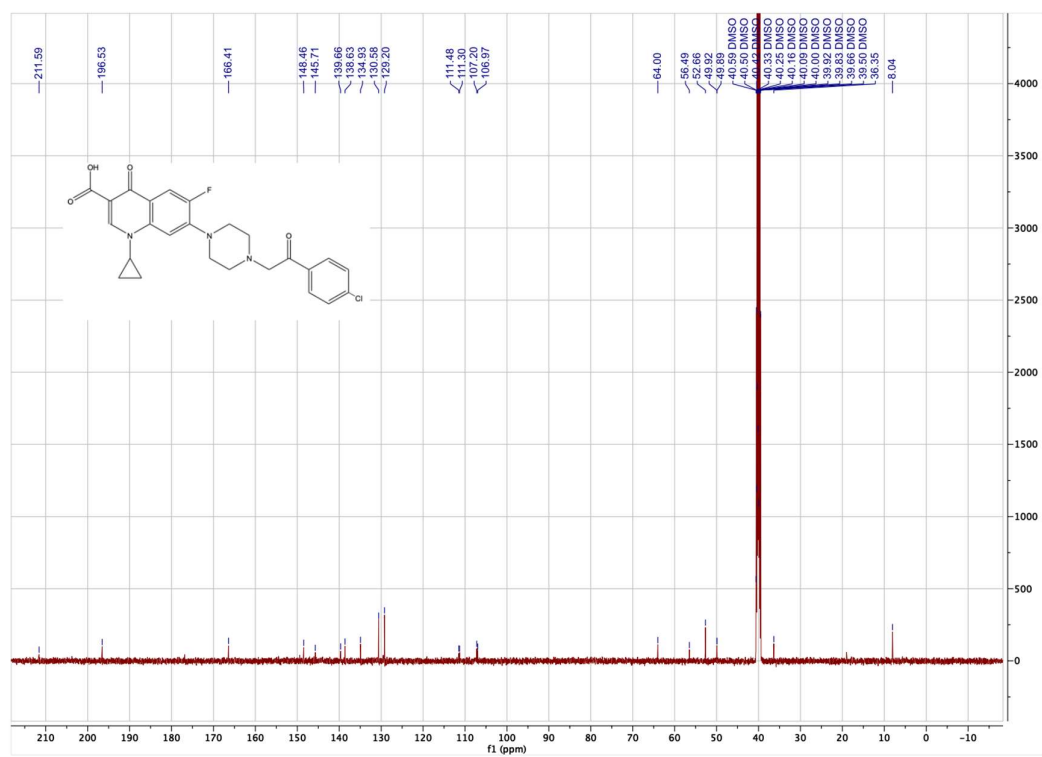 $^{13}\text{C}$  NMR of compound **7b**

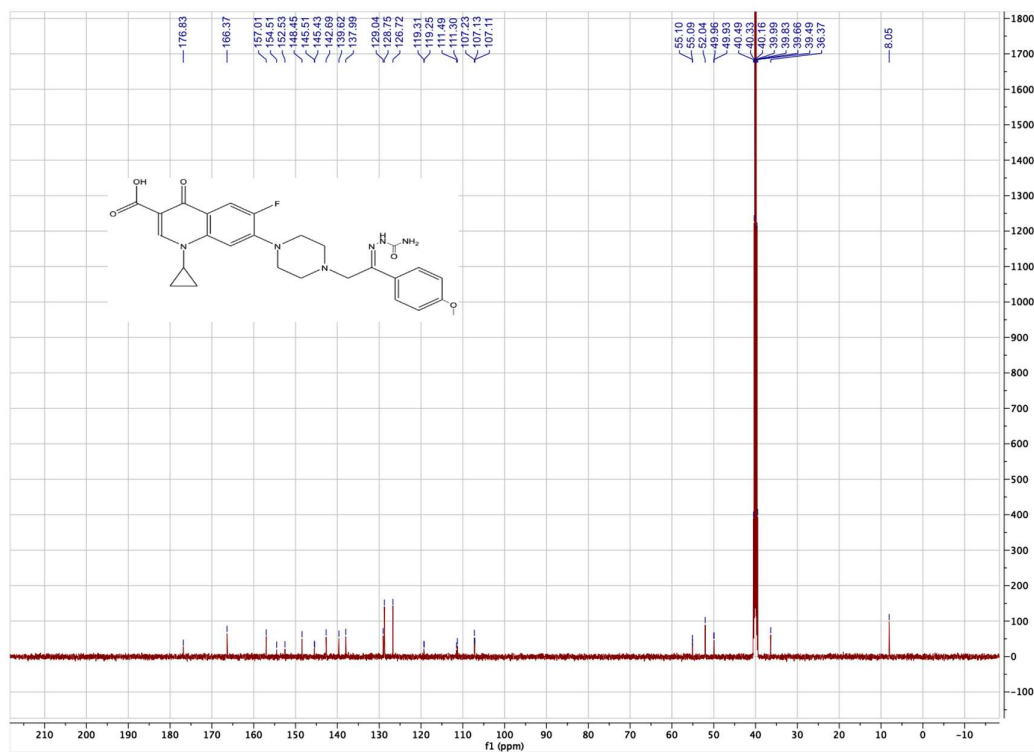

$^{13}\text{C}$  NMR of compound **8a**

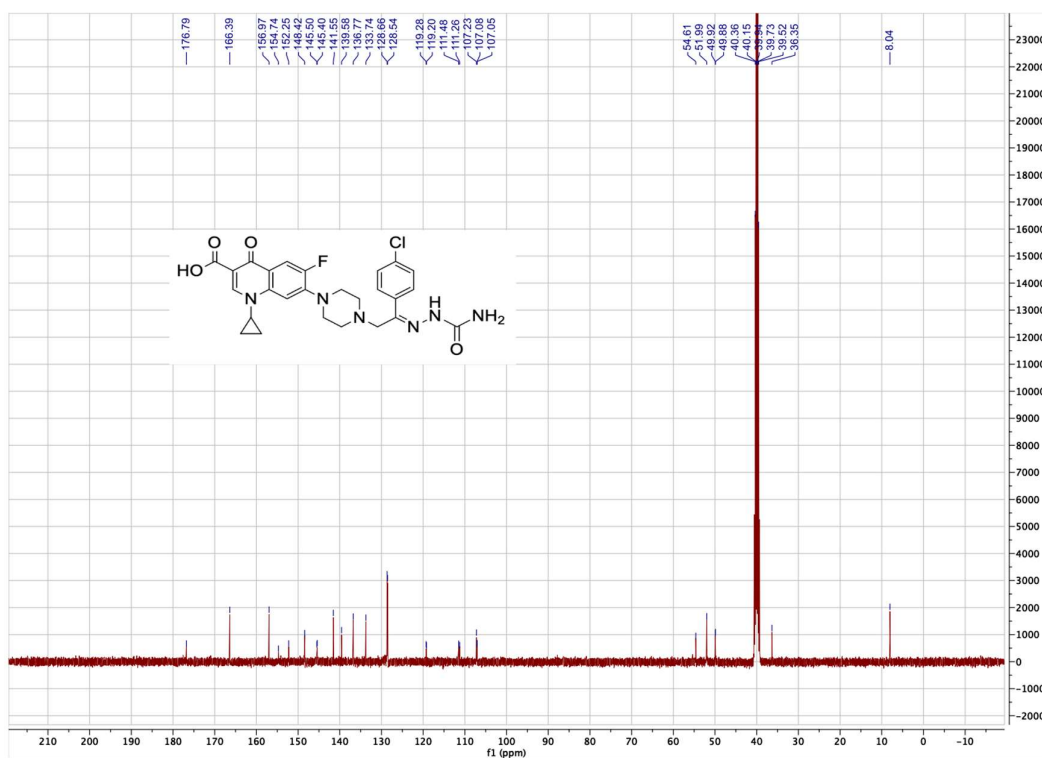

$^{13}\text{C}$  NMR of compound **8b**

## Elemental Composition Report

Page 1

### Single Mass Analysis

Tolerance = 20.0 PPM / DBE: min = -1.5, max = 50.0

Element prediction: Off

Number of isotope peaks used for i-FIT = 3

Monoisotopic Mass, Even Electron Ions

30 formula(e) evaluated with 1 results within limits (up to 50 closest results for each mass)

Elements Used:

C: 29-29 H: 10-35 N: 0-5 O: 0-7 F: 1-1

e

0502-4-M-2 24 (0.151)

1: TOF MS ES+  
8.71e+006

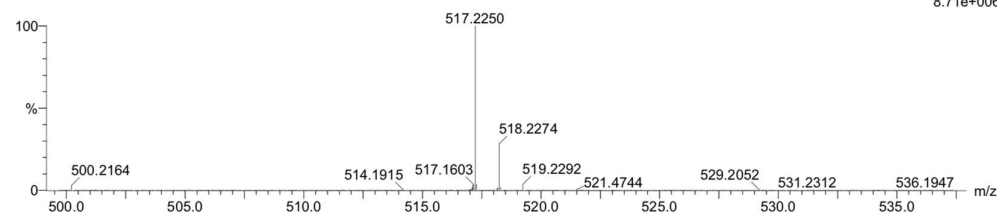

Minimum:  
Maximum:

5.0 20.0 -1.5  
50.0

| Mass     | Calc. Mass | mDa  | PPM  | DBE  | i-FIT  | Norm | Conf(%) | Formula                                                         |
|----------|------------|------|------|------|--------|------|---------|-----------------------------------------------------------------|
| 517.2250 | 517.2251   | -0.1 | -0.2 | 16.5 | 1035.2 | n/a  | n/a     | C <sub>29</sub> H <sub>30</sub> N <sub>4</sub> O <sub>4</sub> F |

## HR-MS of compound 2

## Elemental Composition Report

Page 1

### Single Mass Analysis

Tolerance = 20.0 PPM / DBE: min = -1.5, max = 50.0

Element prediction: Off

Number of isotope peaks used for i-FIT = 3

Monoisotopic Mass, Even Electron Ions

50 formula(e) evaluated with 1 results within limits (up to 50 closest results for each mass)

Elements Used:

C: 29-30 H: 10-35 N: 0-7 O: 0-7 F: 1-1

e

0502-4-M-3A 46 (0.274)

1: TOF MS ES+  
1.65e+005

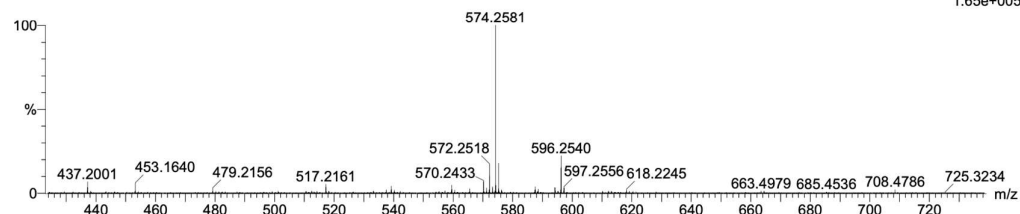

Minimum:  
Maximum:

5.0 20.0 -1.5  
50.0

| Mass     | Calc. Mass | mDa | PPM | DBE  | i-FIT | Norm | Conf(%) | Formula                                                         |
|----------|------------|-----|-----|------|-------|------|---------|-----------------------------------------------------------------|
| 574.2581 | 574.2578   | 0.3 | 0.5 | 17.5 | 817.6 | n/a  | n/a     | C <sub>30</sub> H <sub>33</sub> N <sub>7</sub> O <sub>4</sub> F |

## HR-MS of compound 3a



## Elemental Composition Report

Page 1

## Single Mass Analysis

Tolerance = 20.0 PPM / DBE: min = -1.5, max = 50.0

Element prediction: Off

Number of isotope peaks used for i-FIT = 3

Monoisotopic Mass, Even Electron Ions

46 formula(e) evaluated with 1 results within limits (up to 50 closest results for each mass)

Elements Used:

C: 29-30 H: 10-35 N: 0-7 O: 0-7 F: 1-1 S: 1-1

e

0502-4-M-3B 24 (0.151)

1: TOF MS ES+  
1.89e+006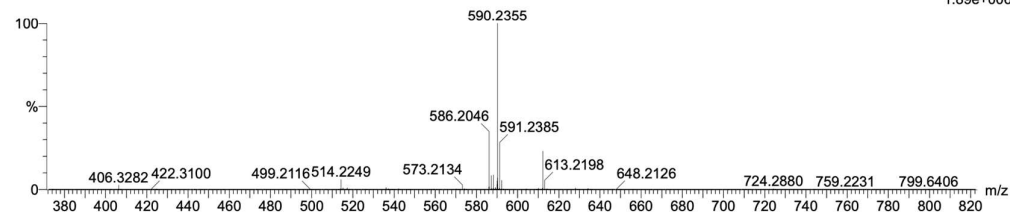Minimum:  
Maximum:5.0 20.0 -1.5  
50.0

| Mass     | Calc. Mass | mDa | PPM | DBE  | i-FIT | Norm | Conf (%) | Formula           |
|----------|------------|-----|-----|------|-------|------|----------|-------------------|
| 590.2355 | 590.2350   | 0.5 | 0.8 | 17.5 | 822.5 | n/a  | n/a      | C30 H33 N7 O3 F S |

*HR-MS of compound 3b*

## Elemental Composition Report

Page 1

## Single Mass Analysis

Tolerance = 20.0 PPM / DBE: min = -1.5, max = 50.0

Element prediction: Off

Number of isotope peaks used for i-FIT = 3

Monoisotopic Mass, Even Electron Ions

26 formula(e) evaluated with 1 results within limits (up to 50 closest results for each mass)

Elements Used:

C: 36-36 H: 30-40 N: 0-7 O: 0-7 F: 1-1

e

0502-4-M-3C 39 (0.238)

1: TOF MS ES+  
1.70e+005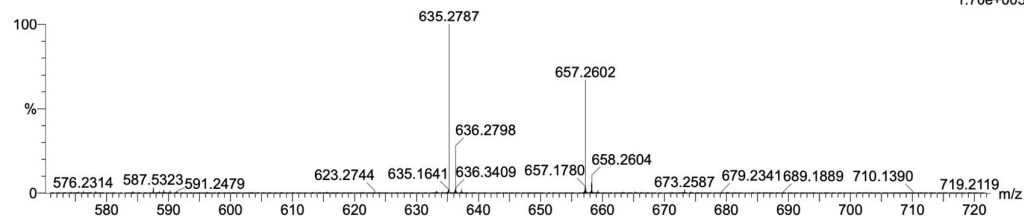Minimum:  
Maximum:5.0 20.0 -1.5  
50.0

| Mass     | Calc. Mass | mDa | PPM | DBE  | i-FIT | Norm | Conf (%) | Formula         |
|----------|------------|-----|-----|------|-------|------|----------|-----------------|
| 635.2787 | 635.2782   | 0.5 | 0.8 | 21.5 | 703.7 | n/a  | n/a      | C36 H36 N6 O4 F |

*HR-MS of compound 3c*

## Elemental Composition Report

Page 1

### Single Mass Analysis

Tolerance = 20.0 PPM / DBE: min = -1.5, max = 50.0

Element prediction: Off

Number of isotope peaks used for i-FIT = 3

Monoisotopic Mass, Even Electron Ions

25 formula(e) evaluated with 1 results within limits (up to 50 closest results for each mass)

Elements Used:

C: 30-30 H: 30-40 N: 0-7 O: 0-7 F: 1-1

e

0502-4-M-3D 21 (0.135)

1: TOF MS ES+  
4.19e+006

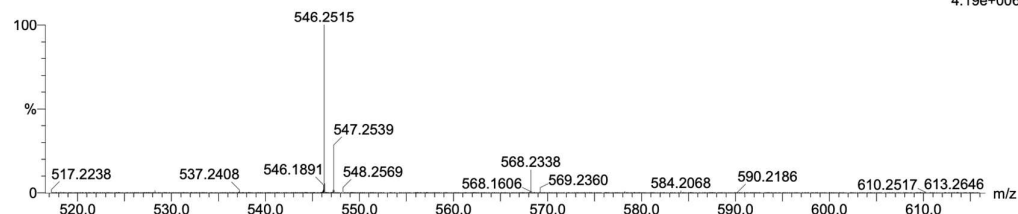

Minimum: -1.5  
Maximum: 50.0

| Mass     | Calc. Mass | mDa  | PPM  | DBE  | i-FIT | Norm | Conf (%) | Formula         |
|----------|------------|------|------|------|-------|------|----------|-----------------|
| 546.2515 | 546.2517   | -0.2 | -0.4 | 16.5 | 958.2 | n/a  | n/a      | C30 H33 N5 O4 F |

*HR-MS of compound 3d*

## Elemental Composition Report

Page 1

### Single Mass Analysis

Tolerance = 20.0 PPM / DBE: min = -1.5, max = 50.0

Element prediction: Off

Number of isotope peaks used for i-FIT = 3

Monoisotopic Mass, Even Electron Ions

26 formula(e) evaluated with 1 results within limits (up to 50 closest results for each mass)

Elements Used:

C: 30-30 H: 30-40 N: 0-7 O: 0-7 F: 1-1

e

0502-4-M-5A 23 (0.146)

1: TOF MS ES+  
4.67e+006

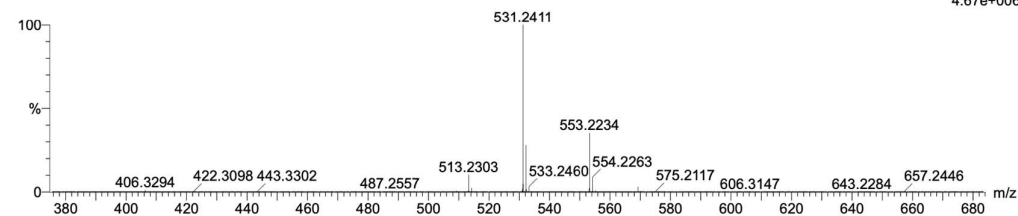

Minimum: -1.5  
Maximum: 50.0

| Mass     | Calc. Mass | mDa | PPM | DBE  | i-FIT | Norm | Conf (%) | Formula         |
|----------|------------|-----|-----|------|-------|------|----------|-----------------|
| 531.2411 | 531.2408   | 0.3 | 0.6 | 16.5 | 941.8 | n/a  | n/a      | C30 H32 N4 O4 F |

*HR-MS of compound 5a*

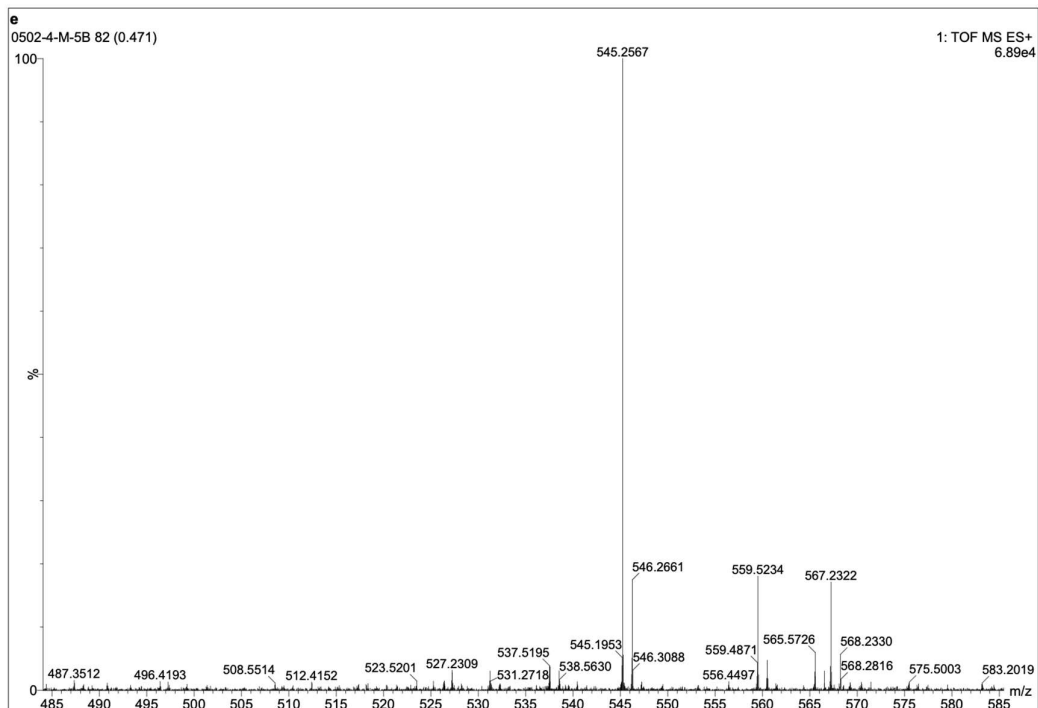

*HR-MS of compound 5b*

## Elemental Composition Report

Page 1

### Single Mass Analysis

Tolerance = 20.0 PPM / DBE: min = -1.5, max = 50.0

Element prediction: Off

Number of isotope peaks used for i-FIT = 3

Monoisotopic Mass, Even Electron Ions

3 formula(e) evaluated with 1 results within limits (up to 50 closest results for each mass)

Elements Used:

C: 31-32 H: 30-40 N: 7-7 O: 0-7 F: 1-1

**e**

0502-4-M-6A 35 (0.217)

1: TOF MS ES+  
1.90e+005

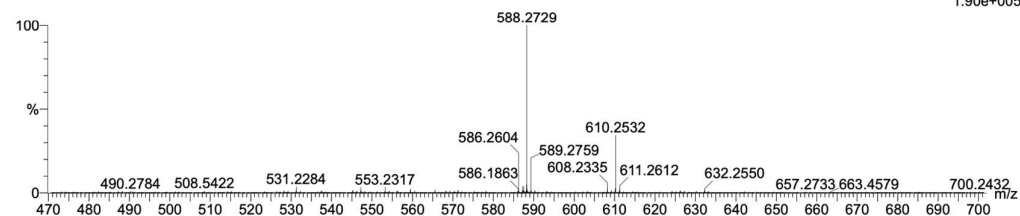

Minimum: -1.5  
Maximum: 5.0 20.0 50.0

| Mass     | Calc. Mass | mDa  | PPM  | DBE  | i-FIT | Norm | Conf (%) | Formula         |
|----------|------------|------|------|------|-------|------|----------|-----------------|
| 588.2729 | 588.2735   | -0.6 | -1.0 | 17.5 | 701.8 | n/a  | n/a      | C31 H35 N7 O4 F |

*HR-MS of compound 6a*

## Elemental Composition Report

Page 1

### Single Mass Analysis

Tolerance = 20.0 PPM / DBE: min = -1.5, max = 50.0

Element prediction: Off

Number of isotope peaks used for i-FIT = 3

Monoisotopic Mass, Even Electron Ions

2 formula(e) evaluated with 1 results within limits (up to 50 closest results for each mass)

Elements Used:

C: 31-32 H: 30-40 N: 7-7 O: 0-7 F: 1-1

e

0502-4-M-6B 81 (0.466)

1: TOF MS ES+  
2.69e+002

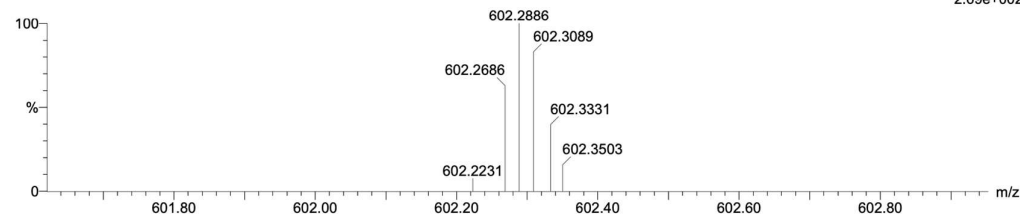

Minimum: -1.5  
Maximum: 50.0

| Mass     | Calc. Mass | mDa  | PPM  | DBE  | i-FIT | Norm | Conf (%) | Formula         |
|----------|------------|------|------|------|-------|------|----------|-----------------|
| 602.2886 | 602.2891   | -0.5 | -0.8 | 17.5 | 49.0  | n/a  | n/a      | C32 H37 N7 O4 F |

*HR-MS of compound 6b*

## Elemental Composition Report

Page 1

### Single Mass Analysis

Tolerance = 20.0 PPM / DBE: min = -1.5, max = 50.0

Element prediction: Off

Number of isotope peaks used for i-FIT = 3

Monoisotopic Mass, Even Electron Ions

43 formula(e) evaluated with 1 results within limits (up to 50 closest results for each mass)

Elements Used:

C: 26-30 H: 27-40 N: 0-7 O: 0-7 F: 1-1

2

0502-4-M-10A 29 (0.177)

1: TOF MS ES+  
3.43e+006

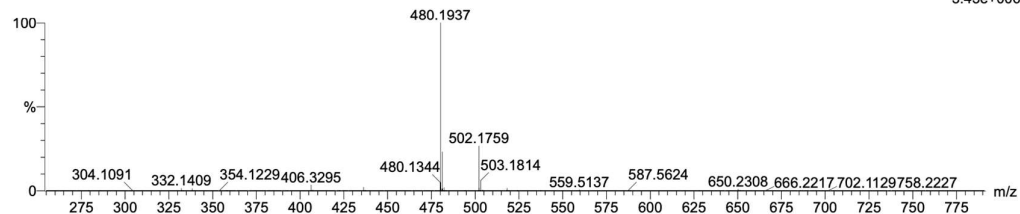

Minimum: -1.5  
Maximum: 50.0

| Mass     | Calc. Mass | mDa | PPM | DBE  | i-FIT  | Norm | Conf (%) | Formula         |
|----------|------------|-----|-----|------|--------|------|----------|-----------------|
| 480.1937 | 480.1935   | 0.2 | 0.4 | 14.5 | 1091.4 | n/a  | n/a      | C26 H27 N3 O5 F |

*HR-MS of compound 7a*

## Elemental Composition Report

Page 1

### Single Mass Analysis

Tolerance = 20.0 PPM / DBE: min = -1.5, max = 50.0

Element prediction: Off

Number of isotope peaks used for i-FIT = 3

Monoisotopic Mass, Even Electron Ions

52 formula(e) evaluated with 1 results within limits (up to 50 closest results for each mass)

Elements Used:

C: 25-29 H: 24-40 N: 0-7 O: 0-7 F: 1-1 Cl: 1-1

2

0502-4-M-10B 25 (0.156)

1: TOF MS ES+  
1.02e+007

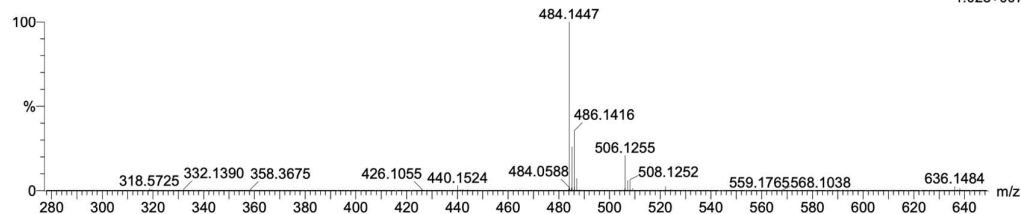

Minimum: -1.5  
Maximum: 50.0

| Mass     | Calc. Mass | mDa | PPM | DBE  | i-FIT  | Norm | Conf(%) | Formula            |
|----------|------------|-----|-----|------|--------|------|---------|--------------------|
| 484.1447 | 484.1439   | 0.8 | 1.7 | 14.5 | 1214.7 | n/a  | n/a     | C25 H24 N3 O4 F Cl |

*HR-MS of compound 7b*

## Elemental Composition Report

Page 1

### Single Mass Analysis

Tolerance = 20.0 PPM / DBE: min = -1.5, max = 50.0

Element prediction: Off

Number of isotope peaks used for i-FIT = 3

Monoisotopic Mass, Even Electron Ions

40 formula(e) evaluated with 1 results within limits (up to 50 closest results for each mass)

Elements Used:

C: 27-27 H: 24-40 N: 0-7 O: 0-7 F: 1-1

2

0502-4-M-11A 113 (0.641)

1: TOF MS ES+  
6.34e+002

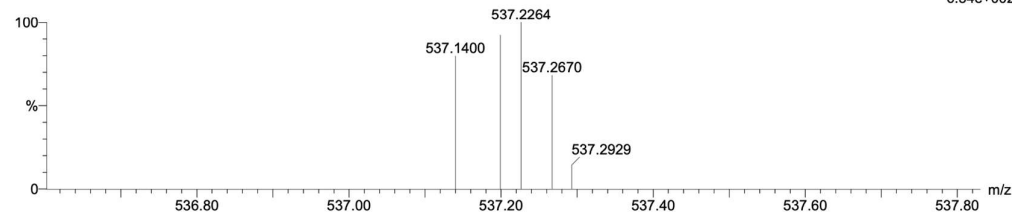

Minimum: -1.5  
Maximum: 50.0

| Mass     | Calc. Mass | mDa | PPM | DBE  | i-FIT | Norm | Conf(%) | Formula         |
|----------|------------|-----|-----|------|-------|------|---------|-----------------|
| 537.2264 | 537.2262   | 0.2 | 0.4 | 15.5 | 44.4  | n/a  | n/a     | C27 H30 N6 O5 F |

*HR-MS of compound 8a*

## Single Mass Analysis

Tolerance = 20.0 PPM / DBE: min = -1.5, max = 50.0

Element prediction: Off

Number of isotope peaks used for i-FIT = 3

Monoisotopic Mass, Even Electron Ions

11 formula(e) evaluated with 1 results within limits (up to 50 closest results for each mass)

Elements Used:

C: 26-27 H: 24-40 N: 5-7 O: 0-7 F: 1-1 Cl: 1-1

2

0502-4-M-11B 40 (0.243)

1: TOF MS ES+  
6.30e+005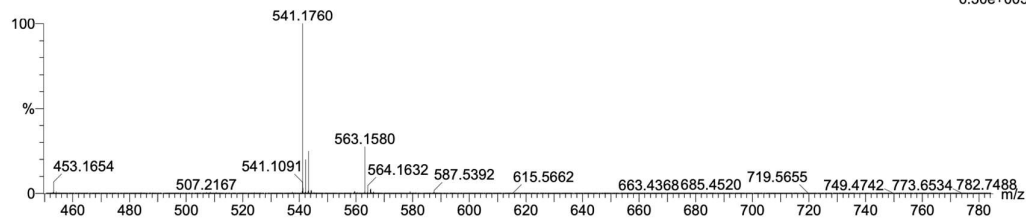

Minimum:

Maximum:

| Mass     | Calc. Mass | mDa  | PPM  | DBE  | i-FIT | Norm | Conf (%) | Formula                                                           |
|----------|------------|------|------|------|-------|------|----------|-------------------------------------------------------------------|
| 541.1760 | 541.1766   | -0.6 | -1.1 | 15.5 | 853.2 | n/a  | n/a      | C <sub>26</sub> H <sub>27</sub> N <sub>6</sub> O <sub>4</sub> FCl |

*HR-MS of compound 8b*
